# Supplementary material for: Distribution and fate of per- and polyfluoroalkyl substances (PFAS) in wastewater treatment facilities
Source: Royal Society of Chemistry journal article supplement (doi:10.1039/d1em00032b), 2021-01-01
Supplement: d1em00032b1.xlsx [file d1em00032b1.xlsx]

## Sheet: Table S3
Table S3. Wastewater sample PFAS concentrations (March).
ANALYTE	SAMPLE ID:		AL+CD			Bard+CD (2)			Bard+CD (3)			AS+UV (1)			OD+CD			AS+UV (2)			AL+CD			Bard+CD (2)			Bard+CD (3)			AS+UV (1)			OD+CD			AS+UV (2)			FIELD BLANK
	COLLECTION DATE:		2019-03-13			2019-03-13			2019-03-13			2019-03-14			2019-03-14			2019-03-14			2019-03-13			2019-03-13			2019-03-13			2019-03-14			2019-03-14			2019-03-14			2019-03-13
	SAMPLE MATRIX:		Influent			Influent			Influent			Influent			Influent			Influent			Effluent			Effluent			Effluent			Effluent			Effluent			Effluent
	CAS	Unit	Conc.	Qualifier	MDL	Conc.	Qualifier	MDL	Conc.	Qualifier	MDL	Conc.	Qualifier	MDL	Conc.	Qualifier	MDL	Conc.	Qualifier	MDL	Conc.	Qualifier	MDL	Conc.	Qualifier	MDL	Conc.	Qualifier	MDL	Conc.	Qualifier	MDL	Conc.	Qualifier	MDL	Conc.	Qualifier	MDL	Conc.	Qualifier	MDL
Perfluorobutanoic Acid (PFBA)	375-22-4	ng/L	4.51	J	3.53	ND		3.75	6.22	J	3.63	7.97	J	3.72	5.92	J	3.66	10.2	J	3.66	ND		0.362	4.38		0.353	12.9		0.351	11		0.351	10.1		0.351	9.28		0.349	ND		0.346
Perfluoropentanoic Acid (PFPeA)	2706-90-3	ng/L	ND		4.39	ND		4.66	5.6	J	4.51	13.5	J	4.62	14.3	J	4.55	17.5	J	4.55	2.83		0.45	7.83		0.439	7.3		0.436	24.1		0.436	11.8		0.436	20.2		0.434	ND		0.43
Perfluorobutanesulfonic Acid (PFBS)	375-73-5	ng/L	4.66	J	3.6	ND		3.82	ND		3.7	ND		3.78	ND		3.72	ND		3.72	ND		0.368	ND		0.36	ND		0.357	ND		0.357	ND		0.357	ND		0.356	ND		0.352
1H,1H,2H,2H-Perfluorohexanesulfonic Acid (4:2FTS)	NONE	ng/L	ND		4.62	ND		4.9	ND		4.75	ND		4.86	ND		4.78	ND		4.78	ND		0.473	ND		0.462	ND		0.459	ND		0.459	ND		0.459	ND		0.457	ND		0.452
Perfluorohexanoic Acid (PFHxA)	307-24-4	ng/L	ND		4.66	ND		4.94	6.81	J	4.78	18.8	J	4.9	27.7		4.82	8.67	J	4.82	6.54		0.477	10.6		0.466	10.4		0.462	50.6		0.462	54.6		0.462	12.5		0.461	ND		0.456
Perfluoropentanesulfonic Acid (PFPeS)	2706-91-4	ng/L	ND		2.25	ND		2.39	ND		2.32	ND		2.37	ND		2.33	ND		2.33	ND		0.231	ND		0.225	ND		0.224	ND		0.224	ND		0.224	ND		0.223	ND		0.22
Perfluoroheptanoic Acid (PFHpA)	375-85-9	ng/L	ND		3.52	ND		3.73	3.93	J	3.62	8.84	J	3.7	5.45	J	3.65	ND		3.65	1.71	J	0.36	1.3	J	0.352	4.46		0.35	8.98		0.35	4.93		0.35	2.53		0.348	ND		0.344
Perfluorohexanesulfonic Acid (PFHxS)	355-46-4	ng/L	26.4		4.13	30.3		4.38	15.1	J	4.24	16.2	J	4.34	37.6		4.27	22.8		4.27	5.34		0.422	2.17		0.413	1.32	J	0.41	2		0.41	1.84	J	0.41	2.29		0.408	ND		0.404
Perfluorooctanoic Acid (PFOA)	335-67-1	ng/L	ND		4.36	ND		4.62	9.26	J	4.47	13.8	J	4.58	6.04	J	4.51	8.27	J	4.51	4.62		0.446	3.77		0.436	11.3		0.432	23.7		0.432	8.14		0.432	7.15		0.431	ND		0.426
1H,1H,2H,2H-Perfluorooctanesulfonic Acid (6:2FTS)	27619-97-2	ng/L	ND		1.84	ND		1.95	ND		1.89	ND		1.93	7.65	J	1.9	ND		1.9	0.6	J	0.188	0.46	J	0.184	ND		0.182	ND		0.182	4.73		0.182	ND		0.182	ND		0.18
Perfluoroheptanesulfonic Acid (PFHpS)	375-92-8	ng/L	ND		4.92	ND		5.22	ND		5.06	ND		5.18	ND		5.1	ND		5.1	ND		0.504	ND		0.492	ND		0.489	ND		0.489	ND		0.489	ND		0.487	ND		0.481
Perfluorononanoic Acid (PFNA)	375-95-1	ng/L	ND		4.13	ND		4.38	ND		4.24	ND		4.34	ND		4.27	ND		4.27	0.7	J	0.422	0.44	J	0.413	1.41	J	0.41	2.11		0.41	ND		0.41	1.03	J	0.408	ND		0.404
Perfluorooctanesulfonic Acid (PFOS)	1763-23-1	ng/L	ND		5.3	ND		5.62	ND		5.45	ND		5.58	ND		5.49	ND		5.49	4.42		0.543	1.95		0.53	3.75		0.526	4.91		0.526	2.91		0.526	6.86		0.524	ND		0.518
Perfluorodecanoic Acid (PFDA)	335-76-2	ng/L	ND		5.87	ND		6.22	ND		6.03	ND		6.18	ND		6.08	ND		6.08	0.62	J	0.601	ND		0.587	0.74	J	0.583	1.32	J	0.583	ND		0.583	ND		0.58	ND		0.574
1H,1H,2H,2H-Perfluorodecanesulfonic Acid (8:2FTS)	39108-34-4	ng/L	ND		2.75	ND		2.92	ND		2.83	ND		2.9	ND		2.85	ND		2.85	ND		0.282	ND		0.275	ND		0.273	ND		0.273	ND		0.273	ND		0.272	ND		0.269
Perfluorononanesulfonic Acid (PFNS)	68259-12-1	ng/L	ND		5.08	ND		5.38	ND		5.21	ND		5.34	ND		5.25	ND		5.25	ND		0.519	ND		0.508	ND		0.504	ND		0.504	ND		0.504	ND		0.502	ND		0.496
N-Methyl Perfluorooctanesulfonamidoacetic Acid (NMeFOSAA)	2355-31-9	ng/L	ND		2.37	ND		2.51	ND		2.44	ND		2.49	ND		2.45	ND		2.45	1.27	J	0.243	0.4	J	0.237	ND		0.235	ND		0.235	0.61	J	0.235	ND		0.234	ND		0.232
Perfluoroundecanoic Acid (PFUnA)	2058-94-8	ng/L	ND		4.02	ND		4.26	ND		4.12	ND		4.22	ND		4.16	ND		4.16	ND		0.411	ND		0.402	ND		0.398	ND		0.398	ND		0.398	ND		0.397	ND		0.392
Perfluorodecanesulfonic Acid (PFDS)	335-77-3	ng/L	ND		3.66	6.06	J	3.88	ND		3.75	ND		3.84	ND		3.78	8.08	J	3.78	ND		0.374	ND		0.366	ND		0.363	ND		0.363	ND		0.363	ND		0.361	ND		0.357
Perfluorooctanesulfonamide (FOSA)	754-91-6	ng/L	ND		5.26	ND		5.58	ND		5.41	ND		5.54	ND		5.45	ND		5.45	ND		0.539	ND		0.526	ND		0.522	ND		0.522	ND		0.522	ND		0.52	ND		0.515
N-Ethyl Perfluorooctanesulfonamidoacetic Acid (NEtFOSAA)	2991-50-6	ng/L	ND		3.53	ND		3.74	ND		3.63	ND		3.71	ND		3.65	ND		3.65	1.31	J	0.361	ND		0.353	ND		0.35	ND		0.35	0.37	J	0.35	ND		0.349	ND		0.345
Perfluorododecanoic Acid (PFDoA)	307-55-1	ng/L	ND		5.61	ND		5.94	ND		5.76	ND		5.9	ND		5.8	ND		5.8	ND		0.574	ND		0.561	ND		0.556	ND		0.556	ND		0.556	ND		0.554	ND		0.548
Perfluorotridecanoic Acid (PFTrDA)	72629-94-8	ng/L	ND		2.97	ND		3.15	ND		3.05	ND		3.13	ND		3.08	ND		3.08	ND		0.304	ND		0.297	ND		0.295	ND		0.295	ND		0.295	ND		0.294	ND		0.291
Perfluorotetradecanoic Acid (PFTA)	376-06-7	ng/L	ND		9.36	ND		9.92	ND		9.61	ND		9.84	ND		9.69	ND		9.69	ND		0.957	ND		0.936	ND		0.928	ND		0.928	ND		0.928	ND		0.925	ND		0.915
Reporting Limit (RL)		ng/L	18.9			20.1			19.4			19.9			19.6			19.6			1.94			18.9			1.88			1.88			1.88			1.87			1.85
Sum 24 PFAS		ng/L	35.57			36.36			46.92			79.11			104.66			75.52			29.96			33.3			53.58			128.72			100.03			61.84
ANALYTE	SAMPLE ID:		AL+CD	Bard+CD (2)	Bard+CD (3)	AS+UV (1)	OD+CD	AS+UV (2)	AL+CD	Bard+CD (2)	Bard+CD (3)	AS+UV (1)	OD+CD	AS+UV (2)	FIELD BLANK
	COLLECTION DATE:		2019-03-13	2019-03-13	2019-03-13	2019-03-14	2019-03-14	2019-03-14	2019-03-13	2019-03-13	2019-03-13	2019-03-14	2019-03-14	2019-03-14	2019-03-13
	SAMPLE MATRIX:		Influent	Influent	Influent	Influent	Influent	Influent	Effluent	Effluent	Effluent	Effluent	Effluent	Effluent
	Molar Mass (g/mol)	Unit	Conc.	Conc.	Conc.	Conc.	Conc.	Conc.	Conc.	Conc.	Conc.	Conc.	Conc.	Conc.	Conc.
Perfluorobutanoic Acid (PFBA)	214.04	pmol/L	21.0708	ND	29.06	37.236	27.6584	47.6546	ND	20.4635	60.2691	51.3923	47.1874	43.3564	ND
Perfluoropentanoic Acid (PFPeA)	264.05	pmol/L	ND	ND	21.2081	51.1267	54.1564	66.2753	10.7177	29.6535	27.6463	91.2706	44.6885	76.5007	ND
Perfluorobutanesulfonic Acid (PFBS)	300.1	pmol/L	15.5282	ND	ND	ND	ND	ND	ND	ND	ND	ND	ND	ND	ND
1H,1H,2H,2H-Perfluorohexanesulfonic Acid (4:2FTS)	328.15	pmol/L	ND	ND	ND	ND	ND	ND	ND	ND	ND	ND	ND	ND	ND
Perfluorohexanoic Acid (PFHxA)	314.05	pmol/L	ND	ND	21.6844	59.8631	88.2025	27.6071	20.8247	33.7526	33.1157	161.121	173.858	39.8026	ND
Perfluoropentanesulfonic Acid (PFPeS)	416.12	pmol/L	ND	ND	ND	ND	ND	ND	ND	ND	ND	ND	ND	ND	ND
Perfluoroheptanoic Acid (PFHpA)	364.06	pmol/L	ND	ND	10.7949	24.2817	14.9701	ND	4.69703	3.57084	12.2507	24.6663	13.5417	6.9494	ND
Perfluorohexanesulfonic Acid (PFHxS)	400.11	pmol/L	65.9819	75.7292	37.7396	40.4889	93.9742	56.9843	13.3463	5.42351	3.29909	4.99863	4.59874	5.72343	ND
Perfluorooctanoic Acid (PFOA)	400.12	pmol/L	ND	ND	23.1431	34.4897	15.0955	20.6688	11.5465	9.42217	28.2415	59.2322	20.3439	17.8696	ND
1H,1H,2H,2H-Perfluorooctanesulfonic Acid (6:2FTS)	428.17	pmol/L	ND	ND	ND	ND	17.8667	ND	1.40131	1.07434	ND	ND	11.047	ND	ND
Perfluoroheptanesulfonic Acid (PFHpS)	450.12	pmol/L	ND	ND	ND	ND	ND	ND	ND	ND	ND	ND	ND	ND	ND
Perfluorononanoic Acid (PFNA)	464.08	pmol/L	ND	ND	ND	ND	ND	ND	1.50836	0.948112	3.03827	4.54663	ND	2.21944	ND
Perfluorooctanesulfonic Acid (PFOS)	500.13	pmol/L	ND	ND	ND	ND	ND	ND	8.8377	3.89899	7.49805	9.81745	5.81849	13.7164	ND
Perfluorodecanoic Acid (PFDA)	614.1	pmol/L	ND	ND	ND	ND	ND	ND	1.00961	ND	1.20502	2.14949	ND	ND	ND
1H,1H,2H,2H-Perfluorodecanesulfonic Acid (8:2FTS)	528.18	pmol/L	ND	ND	ND	ND	ND	ND	ND	ND	ND	ND	ND	ND	ND
Perfluorononanesulfonic Acid (PFNS)	550.14	pmol/L	ND	ND	ND	ND	ND	ND	ND	ND	ND	ND	ND	ND	ND
N-Methyl Perfluorooctanesulfonamidoacetic Acid (NMeFOSAA)	571.21	pmol/L	ND	ND	ND	ND	ND	ND	2.22335	0.700268	ND	ND	1.06791	ND	ND
Perfluoroundecanoic Acid (PFUnA)	564.09	pmol/L	ND	ND	ND	ND	ND	ND	ND	ND	ND	ND	ND	ND	ND
Perfluorodecanesulfonic Acid (PFDS)	600.15	pmol/L	ND	10.0975	ND	ND	ND	13.4633	ND	ND	ND	ND	ND	ND	ND
Perfluorooctanesulfonamide (FOSA)	499.14	pmol/L	ND	ND	ND	ND	ND	ND	ND	ND	ND	ND	ND	ND	ND
N-Ethyl Perfluorooctanesulfonamidoacetic Acid (NEtFOSAA)	585.24	pmol/L	ND	ND	ND	ND	ND	ND	2.2384	ND	ND	ND	0.632219	ND	ND
Perfluorododecanoic Acid (PFDoA)	614.1	pmol/L	ND	ND	ND	ND	ND	ND	ND	ND	ND	ND	ND	ND	ND
Perfluorotridecanoic Acid (PFTrDA)	664.1	pmol/L	ND	ND	ND	ND	ND	ND	ND	ND	ND	ND	ND	ND	ND
Perfluorotetradecanoic Acid (PFTA)	714.11	pmol/L	ND	ND	ND	ND	ND	ND	ND	ND	ND	ND	ND	ND	ND
SumPFAS		pmol/L	102.581	85.8267	143.63	247.486	311.924	232.653	78.351	108.908	176.564	409.194	322.784	206.138	0

## Sheet: Table S4
Table S4. Wastewater sample PFAS concentrations following total oxidizable precursor (TOP) assay (March).
ANALYTE	SAMPLE ID:		AL+CD			Bard+CD (2)			Bard+CD (3)			AS+UV (1)			OD+CD			AS+UV (2)			AL+CD			Bard+CD (2)			Bard+CD (3)			AS+UV (1)			OD+CD			AS+UV (2)
	COLLECTION DATE:		2019-03-13			2019-03-13			2019-03-13			2019-03-13			2019-03-13			2019-03-13			2019-03-13			2019-03-13			2019-03-13			2019-03-13			2019-03-13			2019-03-13
	SAMPLE MATRIX:		Influent			Influent			Influent			Influent			Influent			Influent			Effluent			Effluent			Effluent			Effluent			Effluent			Effluent
	CAS	Unit	Conc.	Qualifier	MDL	Conc.	Qualifier	MDL	Conc.	Qualifier	MDL	Conc.	Qualifier	MDL	Conc.	Qualifier	MDL	Conc.	Qualifier	MDL	Conc.	Qualifier	MDL	Conc.	Qualifier	MDL	Conc.	Qualifier	MDL	Conc.	Qualifier	MDL	Conc.	Qualifier	MDL	Conc.	Qualifier	MDL
Perfluorobutanoic Acid (PFBA)	375-22-4	ng/L	32.4		0.402	63.9		0.388	49.7		0.382	69.5		0.383	2230		0.374	43.1		0.378	25.8		0.383	28.1		0.385	19.6		0.378	49.6		0.375	39.2		0.374	27.1		0.376
Perfluoropentanoic Acid (PFPeA)	2706-90-3	ng/L	30.3		0.39	29.4		0.376	64.4		0.371	111		0.372	2960		0.363	59.7		0.367	23.1		0.372	22.5		0.374	18.5		0.367	65.3		0.364	44.1		0.363	41.1		0.365
Perfluorobutanesulfonic Acid (PFBS)	375-73-5	ng/L	5.65		0.234	4.3		0.226	5.32		0.223	6.46		0.224	18.5		0.218	5.14		0.22	5.72		0.224	2.28		0.224	3.67		0.22	5.16		0.219	3.11		0.218	3.51		0.22
Perfluorohexanoic Acid (PFHxA)	307-24-4	ng/L	26.6		0.323	24.9		0.312	59.5		0.307	121		0.308	1060		0.3	47.5		0.304	26.2		0.308	23.4		0.309	23.7		0.304	89.5		0.301	90.1		0.3	30.7		0.302
Perfluoropentanesulfonic Acid (PFPeS)	2706-91-4	ng/L	0.34	J	0.241	ND		0.233	0.33	J	0.23	1.07	J	0.23	3.04		0.224	0.81	J	0.227	0.25	J	0.23	ND		0.231	0.3	J	0.227	0.7	J	0.225	0.33	J	0.224	0.52	J	0.226
Perfluoroheptanoic Acid (PFHpA)	375-85-9	ng/L	17.2		0.222	14.1		0.214	23.8		0.211	43.8		0.212	66.5		0.206	24.1		0.208	16.3		0.212	10.1		0.212	13.4		0.208	25.2		0.207	20.6		0.206	12		0.208
Perfluorohexanesulfonic Acid (PFHxS)	355-46-4	ng/L	1.67	J	0.37	1.22	J	0.357	2.31		0.352	3.04		0.353	2.64		0.344	4.7		0.348	1.97		0.353	1.48	J	0.355	2.08		0.348	2.24		0.346	2.48		0.344	2.59		0.347
Perfluorooctanoic Acid (PFOA)	335-67-1	ng/L	46.8		0.232	49.1		0.224	52.7		0.221	65.8		0.222	37.8		0.216	62.4		0.218	53.8		0.222	49.7		0.223	63.7		0.218	119		0.217	111		0.216	61		0.218
Perfluoroheptanesulfonic Acid (PFHpS)	375-92-8	ng/L	ND		0.677	ND		0.654	ND		0.644	ND		0.647	ND		0.63	ND		0.637	ND		0.647	ND		0.649	ND		0.637	ND		0.632	ND		0.63	ND		0.635
Perfluorononanoic Acid (PFNA)	375-95-1	ng/L	3.13		0.307	3.1		0.296	5.62		0.292	6.5		0.293	1.74	J	0.286	6.17		0.289	3.57		0.293	1.16	J	0.294	1.66	J	0.289	2.32		0.287	0.77	J	0.286	1.6	J	0.288
Perfluorooctanesulfonic Acid (PFOS)	1763-23-1	ng/L	5.51		0.496	3.54		0.479	6.67		0.472	9.4		0.474	8.5		0.462	17.2		0.467	5.57		0.474	2.87		0.475	4.58		0.467	6.04		0.463	3.89		0.462	10.3		0.465
Perfluorodecanoic Acid (PFDA)	335-76-2	ng/L	1.88	J	0.299	2.05		0.289	2.91		0.285	5.15		0.286	0.84	J	0.278	4.93		0.281	2.6		0.286	0.51	J	0.287	0.82	J	0.281	1.13	J	0.279	0.65	J	0.278	0.69	J	0.28
Perfluorononanesulfonic Acid (PFNS)	68259-12-1	ng/L	ND		1.1	ND		1.06	ND		1.05	ND		1.05	ND		1.02	ND		1.04	ND		1.05	ND		1.06	ND		1.04	ND		1.03	ND		1.02	ND		1.03
Perfluoroundecanoic Acid (PFUnA)	2058-94-8	ng/L	0.74	J	0.256	0.72	J	0.247	1.14	J	0.243	1.38	J	0.244	0.26	J	0.238	1.11	J	0.241	0.9	J	0.244	ND		0.245	ND		0.241	ND		0.239	ND		0.238	ND		0.24
Perfluorodecanesulfonic Acid (PFDS)	335-77-3	ng/L	ND		0.964	ND		0.932	ND		0.918	ND		0.921	ND		0.897	ND		0.907	ND		0.921	ND		0.924	ND		0.907	ND		0.901	ND		0.897	ND		0.904
Perfluorododecanoic Acid (PFDoA)	307-55-1	ng/L	0.52	J	0.366	0.58	J	0.354	1.1	J	0.348	1.36	J	0.35	ND		0.341	1.08	J	0.344	0.51	J	0.35	ND		0.351	ND		0.344	ND		0.342	ND		0.341	ND		0.343
Perfluorotridecanoic Acid (PFTrDA)	72629-94-8	ng/L	ND		0.322	ND		0.311	0.33	J	0.306	0.5	J	0.308	ND		0.3	ND		0.303	ND		0.308	ND		0.309	ND		0.303	ND		0.301	ND		0.3	ND		0.302
Perfluorotetradecanoic Acid (PFTA)	376-06-7	ng/L	0.35	J	0.244	0.3	J	0.236	0.45	J	0.232	0.52	J	0.233	ND		0.227	0.32	J	0.23	ND		0.233	ND		0.234	ND		0.23	ND		0.228	ND		0.227	ND		0.229
Reporting Limit (RL)		ng/L	1.97			1.9			1.87			1.88			1.83			1.85			1.88			1.89			1.85			1.84			1.83			1.84
Sum 18 PFAS (Post TOP Assay)		ng/L	173.09			197.21			276.28			446.48			6389.82			278.26			166.29			142.1			152.01			366.19			316.23			191.11
ANALYTE	SAMPLE ID:			AL+CD	Bard+CD (2)	Bard+CD (3)	AS+UV (1)	OD+CD	AS+UV (2)	AL+CD	Bard+CD (2)	Bard+CD (3)	AS+UV (1)	OD+CD	AS+UV (2)
	COLLECTION DATE:			2019-03-13	2019-03-13	2019-03-13	2019-03-13	2019-03-13	2019-03-13	2019-03-13	2019-03-13	2019-03-13	2019-03-13	2019-03-13	2019-03-13
	SAMPLE MATRIX:			Influent	Influent	Influent	Influent	Influent	Influent	Effluent	Effluent	Effluent	Effluent	Effluent	Effluent
	CAS	Molar Mass	Unit	Conc.	Conc.	Conc.	Conc.	Conc.	Conc.	Conc.	Conc.	Conc.	Conc.	Conc.	Conc.
Perfluorobutanoic Acid (PFBA)	375-22-4	214.04	pmol/L	151.374	298.542	232.2	324.706	10418.6	201.364	120.538	131.284	91.5717	231.732	183.143	126.612
Perfluoropentanoic Acid (PFPeA)	2706-90-3	264.05	pmol/L	114.751	111.343	243.893	420.375	11210	226.094	87.4834	85.2111	70.0625	247.302	167.014	155.652
Perfluorobutanesulfonic Acid (PFBS)	375-73-5	300.1	pmol/L	18.8271	14.3286	17.7274	21.5262	61.6461	17.1276	19.0603	7.59747	12.2293	17.1943	10.3632	11.6961
Perfluorohexanoic Acid (PFHxA)	307-24-4	314.05	pmol/L	84.6999	79.2867	189.46	385.289	3375.26	151.25	83.4262	74.5104	75.4657	284.986	286.897	97.7551
Perfluoropentanesulfonic Acid (PFPeS)	2706-91-4	416.12	pmol/L	0.817072	ND	0.79304	2.57137	7.30558	1.94655	0.600788	ND	0.720946	1.68221	0.79304	1.24964
Perfluoroheptanoic Acid (PFHpA)	375-85-9	364.06	pmol/L	47.245	38.7299	65.3738	120.31	182.662	66.1979	44.7728	27.7427	36.8071	69.2194	56.5841	32.9616
Perfluorohexanesulfonic Acid (PFHxS)	355-46-4	400.11	pmol/L	4.17385	3.04916	5.77341	7.59791	6.59819	11.7468	4.92365	3.69898	5.19857	5.59846	6.1983	6.47322
Perfluorooctanoic Acid (PFOA)	335-67-1	400.12	pmol/L	116.965	122.713	131.71	164.451	94.4717	155.953	134.46	124.213	159.202	297.411	277.417	152.454
Perfluoroheptanesulfonic Acid (PFHpS)	375-92-8	450.12	pmol/L	ND	ND	ND	ND	ND	ND	ND	ND	ND	ND	ND	ND
Perfluorononanoic Acid (PFNA)	375-95-1	464.08	pmol/L	6.74453	6.67988	12.11	14.0062	3.74935	13.2951	7.69264	2.49957	3.57697	4.99914	1.6592	3.44768
Perfluorooctanesulfonic Acid (PFOS)	1763-23-1	500.13	pmol/L	11.0171	7.07816	13.3365	18.7951	16.9956	34.3911	11.1371	5.73851	9.15762	12.0769	7.77798	20.5946
Perfluorodecanoic Acid (PFDA)	335-76-2	614.1	pmol/L	3.06139	3.33822	4.73864	8.38626	1.36786	8.02801	4.23384	0.830484	1.33529	1.84009	1.05846	1.1236
Perfluorononanesulfonic Acid (PFNS)	68259-12-1	550.14	pmol/L	ND	ND	ND	ND	ND	ND	ND	ND	ND	ND	ND	ND
Perfluoroundecanoic Acid (PFUnA)	2058-94-8	564.09	pmol/L	1.31185	1.27639	2.02095	2.44642	0.460919	1.96777	1.59549	ND	ND	ND	ND	ND
Perfluorodecanesulfonic Acid (PFDS)	335-77-3	600.15	pmol/L	ND	ND	ND	ND	ND	ND	ND	ND	ND	ND	ND	ND
Perfluorododecanoic Acid (PFDoA)	307-55-1	614.1	pmol/L	0.846768	0.944472	1.79124	2.21462	ND	1.75867	0.830484	ND	ND	ND	ND	ND
Perfluorotridecanoic Acid (PFTrDA)	72629-94-8	664.1	pmol/L	ND	ND	0.496913	0.752899	ND	ND	ND	ND	ND	ND	ND	ND
Perfluorotetradecanoic Acid (PFTA)	376-06-7	714.11	pmol/L	0.490121	0.420103	0.630155	0.728179	ND	0.44811	ND	ND	ND	ND	ND	ND
SumPFAS (post TOP Assay)				562.324	687.73	922.056	1494.16	25379.1	891.568	520.755	463.326	465.328	1174.04	998.905	610.02

## Sheet: Table S5
Table S5. Wastewater sample PFAS concentrations (July).
ANALYTE	LOCATION		Bard+CD (1)								Bard+CD (2)								Bard+CD (3)								OD+CD								FIELD BLANK
	SAMPLING DATE		7/17/2019		7/17/2019		7/17/2019		7/17/2019		7/17/2019		7/17/2019		7/17/2019		7/17/2019		2019-07-16		2019-07-16		2019-07-16		2019-07-16		2019-07-16		2019-07-16		2019-07-16		2019-07-16		2019-07-16
	SAMPLE TYPE		After Primary		After Secondary		After Chlorination		After Dechlorination		After Primary		After Secondary		After Chlorination		After Dechlorination		After Primary		After Secondary		After Chlorination		After Dechlorination		After Primary		After Secondary		After Chlorination		After Dechlorination
	CAS	Unit	Results	Qualifier	Results	Qualifier	Results	Qualifier	Results	Qualifier	Results	Qualifier	Results	Qualifier	Results	Qualifier	Results	Qualifier	Results	Qualifier	Results	Qualifier	Results	Qualifier	Results	Qualifier	Results	Qualifier	Results	Qualifier	Results	Qualifier	Results	Qualifier	Results	Qualifier
Perfluorobutanoic Acid (PFBA)	375-22-4	ng/L	6.01		5.91		ND		43.2		5.86		3.47		5.04		6.32		10.5		7.33		10.6		14.9		4.71		5.37		8.16		9.17		ND
Perfluoropentanoic Acid (PFPeA)	2706-90-3	ng/L	3.42		23.4		21.9		23.6		4.78		19.2		18		20.5		22.2		30.7		30.6		30.3		5.66		47.5		36.7		32.8		ND
Perfluorobutanesulfonic Acid (PFBS)	375-73-5	ng/L	3.83		7.41		7.49		7.79		2.14		3.49		3.96		3.72		5.82		4.85		4.71		4.88		1.92		2.88		4.32		3.59		ND
1H,1H,2H,2H-Perfluorohexanesulfonic Acid (4:2FTS)	NONE	ng/L	ND		ND		ND		ND		ND		ND		ND		ND		ND		ND		ND		ND		ND		ND		ND		ND		ND
Perfluorohexanoic Acid (PFHxA)	307-24-4	ng/L	4.26		40.2		37.4		40.5		6.69		19.9		18.7		21.2		34.8		46.7		66.4		63.6		6.56		52.1		44.8		38.6		ND
Perfluoropentanesulfonic Acid (PFPeS)	2706-91-4	ng/L	ND		ND		ND		ND		ND		ND		ND		ND		ND		ND		ND		ND		ND		ND		0.46	J	ND		ND
Perfluoroheptanoic Acid (PFHpA)	375-85-9	ng/L	1.75	J	2.33	J	2.37		2.49		0.92	J	1.32	J	1.25	J	1.77	J	4		5.51		5.49		5.82		2.93		3.98		4.82		3.93		ND
Perfluorohexanesulfonic Acid (PFHxS)	355-46-4	ng/L	1.29	J	1.36	J	1.08	J	1.7	J	1.12	J	0.87	J	0.88	J	1.37	J	2.08	J	1.28	J	2.59		2.52		1.96		3.5		3.15		3.06		ND
Perfluorooctanoic Acid (PFOA)	335-67-1	ng/L	4.5		8.7		7.74		8.85		3.13		6.91		5.31		7.9		11.1		13.6		14.3		16.4		4.85		14.3		12.4		11.3		ND
1H,1H,2H,2H-Perfluorooctanesulfonic Acid (6:2FTS)	27619-97-2	ng/L	ND		ND		ND		ND		ND		ND		ND		ND		ND		ND		ND		ND		6.31		2.46		ND		ND		ND
Perfluoroheptanesulfonic Acid (PFHpS)	375-92-8	ng/L	ND		ND		ND		ND		ND		ND		ND		ND		ND		ND		ND		ND		ND		ND		ND		ND		ND
Perfluorononanoic Acid (PFNA)	375-95-1	ng/L	0.7	J	1.09	J	0.92	J	0.99	J	0.4	J	0.93	J	0.67	J	0.87	J	26.4		55.6		38.9		48.1		0.31	J	1.01	J	0.9	J	0.79	J	ND
Perfluorooctanesulfonic Acid (PFOS)	1763-23-1	ng/L	8.06		5.17		3.57		4.01		5.18		3.7		2.93		3.78		10.3		6.65		5.68		7.94		6.36		5.6		5.94		5.78		ND
Perfluorodecanoic Acid (PFDA)	335-76-2	ng/L	0.43	J	2.05	J	1.36	J	1.57	J	0.52	J	1.67	J	1.16	J	1.75	J	2.09	J	3.7		2.87		3.51		ND		1.45	J	0.96	J	0.9	J	ND
1H,1H,2H,2H-Perfluorodecanesulfonic Acid (8:2FTS)	39108-34-4	ng/L	ND		ND		ND		ND		ND		ND		ND		ND		ND		ND		ND		ND		ND		ND		ND		ND		ND
Perfluorononanesulfonic Acid (PFNS)	68259-12-1	ng/L	ND		ND		ND		ND		ND		ND		ND		ND		ND		ND		ND		ND		ND		ND		ND		ND		ND
N-Methyl Perfluorooctanesulfonamidoacetic Acid (NMeFOSAA)	2355-31-9	ng/L	ND		2.69		ND		0.66	J	ND		1.04	J	ND		1.05	J	ND		0.96	J	ND		ND		ND		ND		ND		ND		ND
Perfluoroundecanoic Acid (PFUnA)	2058-94-8	ng/L	ND		ND		ND		ND		ND		ND		ND		ND		1.26	J	1.03	J	0.46	J	0.45	J	ND		ND		ND		ND		ND
Perfluorodecanesulfonic Acid (PFDS)	335-77-3	ng/L	1.84	J	ND		ND		ND		ND		ND		ND		ND		1.32	J	ND		ND		ND		ND		ND		ND		ND		ND
Perfluorooctanesulfonamide (FOSA)	754-91-6	ng/L	ND		ND		ND		ND		ND		ND		ND		ND		ND		ND		ND		ND		ND		ND		ND		ND		ND
N-Ethyl Perfluorooctanesulfonamidoacetic Acid (NEtFOSAA)	2991-50-6	ng/L	ND		2.46		ND		ND		ND		1.06	J	ND		ND		ND		ND		ND		ND		ND		ND		ND		ND		ND
Perfluorododecanoic Acid (PFDoA)	307-55-1	ng/L	ND		ND		ND		ND		ND		ND		ND		ND		ND		ND		ND		ND		ND		ND		ND		ND		ND
Perfluorotridecanoic Acid (PFTrDA)	72629-94-8	ng/L	ND		ND		ND		ND		ND		ND		ND		ND		ND		ND		ND		ND		ND		ND		ND		ND		ND
Perfluorotetradecanoic Acid (PFTA)	376-06-7	ng/L	ND		0.53	J	ND		ND		ND		ND		ND		ND		ND		ND		ND		ND		ND		ND		ND		ND		ND
Reporting Limit (RL)		ng/L	1.86		2.34		1.87		1.83		1.81		2.46		1.82		1.81		2.11		2.12		1.86		1.82		1.85		2.46		1.82		1.84		1.78
Sum 24 PFAS		ng/L	36.09		103.3		83.83		135.36		30.74		63.56		57.9		70.23		131.87		177.91		182.6		198.42		41.57		140.15		122.61		109.92		0
ANALYTE	LOCATION		Bard+CD (1)				Bard+CD (2)				Bard+CD (3)				OD+CD				FIELD BLANK
	SAMPLING DATE		7/17/2019	7/17/2019	7/17/2019	7/17/2019	7/17/2019	7/17/2019	7/17/2019	7/17/2019	2019-07-16	2019-07-16	2019-07-16	2019-07-16	2019-07-16	2019-07-16	2019-07-16	2019-07-16	2019-07-16
	SAMPLE TYPE		After Primary	After Secondary	After Chlorination	After Dechlorination	After Primary	After Secondary	After Chlorination	After Dechlorination	After Primary	After Secondary	After Chlorination	After Dechlorination	After Primary	After Secondary	After Chlorination	After Dechlorination
	Molar Mass (g/mol)	Unit	Results	Results	Results	Results	Results	Results	Results	Results	Results	Results	Results	Results	Results	Results	Results	Results	Results
Perfluorobutanoic Acid (PFBA)	214.04	pmol/L	28.0789	27.6117	ND	201.831	27.3781	16.2119	23.547	29.5272	49.0563	34.2459	49.5235	69.6132	22.0052	25.0888	38.1237	42.8425	ND
Perfluoropentanoic Acid (PFPeA)	264.05	pmol/L	12.9521	88.6196	82.9388	89.377	18.1026	72.7135	68.1689	77.6368	84.075	116.266	115.887	114.751	21.4353	179.89	138.989	124.219	ND
Perfluorobutanesulfonic Acid (PFBS)	300.1	pmol/L	12.7624	24.6918	24.9583	25.958	7.13096	11.6295	13.1956	12.3959	19.3935	16.1613	15.6948	16.2612	6.39787	9.5968	14.3952	11.9627	ND
1H,1H,2H,2H-Perfluorohexanesulfonic Acid (4:2FTS)	328.15	pmol/L	ND	ND	ND	ND	ND	ND	ND	ND	ND	ND	ND	ND	ND	ND	ND	ND	ND
Perfluorohexanoic Acid (PFHxA)	314.05	pmol/L	13.5647	128.005	119.089	128.96	21.3023	63.3657	59.5447	67.5052	110.81	148.702	211.431	202.516	20.8884	165.897	142.652	122.91	ND
Perfluoropentanesulfonic Acid (PFPeS)	416.12	pmol/L	ND	ND	ND	ND	ND	ND	ND	ND	ND	ND	ND	ND	ND	ND	1.10545	ND	ND
Perfluoroheptanoic Acid (PFHpA)	364.06	pmol/L	4.8069	6.40004	6.50992	6.83953	2.52706	3.62578	3.4335	4.86184	10.9872	15.1349	15.0799	15.9864	8.04812	10.9323	13.2396	10.7949	ND
Perfluorohexanesulfonic Acid (PFHxS)	400.11	pmol/L	3.22411	3.39907	2.69926	4.24883	2.79923	2.1744	2.1994	3.42406	5.19857	3.19912	6.47322	6.29827	4.89865	8.74759	7.87283	7.6479	ND
Perfluorooctanoic Acid (PFOA)	400.12	pmol/L	11.2466	21.7435	19.3442	22.1184	7.82265	17.2698	13.271	19.7441	27.7417	33.9898	35.7393	40.9877	12.1214	35.7393	30.9907	28.2415	ND
1H,1H,2H,2H-Perfluorooctanesulfonic Acid (6:2FTS)	428.17	pmol/L	ND	ND	ND	ND	ND	ND	ND	ND	ND	ND	ND	ND	14.7371	5.74538	ND	ND	ND
Perfluoroheptanesulfonic Acid (PFHpS)	450.12	pmol/L	ND	ND	ND	ND	ND	ND	ND	ND	ND	ND	ND	ND	ND	ND	ND	ND	ND
Perfluorononanoic Acid (PFNA)	464.08	pmol/L	1.50836	2.34873	1.98242	2.13325	0.86192	2.00396	1.44372	1.87468	56.8867	119.807	83.8218	103.646	0.667988	2.17635	1.93932	1.70229	ND
Perfluorooctanesulfonic Acid (PFOS)	500.13	pmol/L	16.1158	10.3373	7.13814	8.01792	10.3573	7.39808	5.85848	7.55803	20.5946	13.2965	11.357	15.8759	12.7167	11.1971	11.8769	11.557	ND
Perfluorodecanoic Acid (PFDA)	614.1	pmol/L	0.700212	3.33822	2.21462	2.55659	0.846768	2.71943	1.88894	2.8497	3.40335	6.02508	4.67351	5.71568	ND	2.36118	1.56326	1.46556	ND
1H,1H,2H,2H-Perfluorodecanesulfonic Acid (8:2FTS)	528.18	pmol/L	ND	ND	ND	ND	ND	ND	ND	ND	ND	ND	ND	ND	ND	ND	ND	ND	ND
Perfluorononanesulfonic Acid (PFNS)	550.14	pmol/L	ND	ND	ND	ND	ND	ND	ND	ND	ND	ND	ND	ND	ND	ND	ND	ND	ND
N-Methyl Perfluorooctanesulfonamidoacetic Acid (NMeFOSAA)	571.21	pmol/L	ND	4.7093	ND	1.15544	ND	1.8207	ND	1.8382	ND	1.68064	ND	ND	ND	ND	ND	ND	ND
Perfluoroundecanoic Acid (PFUnA)	564.09	pmol/L	ND	ND	ND	ND	ND	ND	ND	ND	2.23369	1.82595	0.815473	0.797745	ND	ND	ND	ND	ND
Perfluorodecanesulfonic Acid (PFDS)	600.15	pmol/L	3.0659	ND	ND	ND	ND	ND	ND	ND	2.19945	ND	ND	ND	ND	ND	ND	ND	ND
Perfluorooctanesulfonamide (FOSA)	499.14	pmol/L	ND	ND	ND	ND	ND	ND	ND	ND	ND	ND	ND	ND	ND	ND	ND	ND	ND
N-Ethyl Perfluorooctanesulfonamidoacetic Acid (NEtFOSAA)	585.24	pmol/L	ND	4.2034	ND	ND	ND	1.81122	ND	ND	ND	ND	ND	ND	ND	ND	ND	ND	ND
Perfluorododecanoic Acid (PFDoA)	614.1	pmol/L	ND	ND	ND	ND	ND	ND	ND	ND	ND	ND	ND	ND	ND	ND	ND	ND	ND
Perfluorotridecanoic Acid (PFTrDA)	664.1	pmol/L	ND	ND	ND	ND	ND	ND	ND	ND	ND	ND	ND	ND	ND	ND	ND	ND	ND
Perfluorotetradecanoic Acid (PFTA)	714.11	pmol/L	ND	0.742183	ND	ND	ND	ND	ND	ND	ND	ND	ND	ND	ND	ND	ND	ND	ND
SumPFAS			108.026	326.15	266.875	493.197	99.1289	202.744	192.551	229.216	392.58	510.334	550.497	592.448	123.917	457.372	402.748	363.344	0

## Sheet: Table S6
Table S6. Wastewater sample PFAS concentrations following total oxidizable precursor (TOP) assay (July).
	LOCATION		Bard+CD (1)								Bard+CD (2)								Bard+CD (3)								OD+CD								FIELD BLANK
	SAMPLING DATE		2019-07-17		2019-07-17		2019-07-17		2019-07-17		2019-07-17		2019-07-17		2019-07-17		2019-07-17		2019-07-16		2019-07-16		2019-07-16		2019-07-16		2019-07-16		2019-07-16		2019-07-16		2019-07-16		2019-07-16
	SAMPLE TYPE		After Primary		After Secondary		After Chlorination		After Dechlorination		After Primary		After Secondary		After Chlorination		After Dechlorination		After Primary		After Secondary		After Chlorination		After Dechlorination		After Primary		After Secondary		After Chlorination		After Dechlorination
Perfluorinated Alkyl Acids by Isotope Dilution	CAS	Units	Conc.	Qualifier	Conc.	Qualifier	Conc.	Qualifier	Conc.	Qualifier	Conc.	Qualifier	Conc.	Qualifier	Conc.	Qualifier	Conc.	Qualifier	Conc.	Qualifier	Conc.	Qualifier	Conc.	Qualifier	Conc.	Qualifier	Conc.	Qualifier	Conc.	Qualifier	Conc.	Qualifier	Conc.	Qualifier	Conc.	Qualifier
Perfluorobutanoic Acid (PFBA)	375-22-4	ng/L	46.4		103		7.45		8.8		41.7		26.3		7.71		6.22		52.4		25.8		8.04		7.47		4.74		24.2		10.9		5.22		ND
Perfluoropentanoic Acid (PFPeA)	2706-90-3	ng/L	4.12		22.7		15		27.6		5.54		11.7		13.7		13		29.8		17.8		23		21.7		3.77		27.7		43.1		20.2		ND
Perfluorobutanesulfonic Acid (PFBS)	375-73-5	ng/L	4.76		8.4		4.13		9.1		2.77		1.85	J	1.71	J	2.32		7.85		2.48		3.16		3.13		1.27	J	2.07	J	6.08		2.3		ND
Perfluorohexanoic Acid (PFHxA)	307-24-4	ng/L	4.34		44.3		22.5		40.6		5.6		15.9		12.1		11.8		44.6		58		35.1		33.6		4.18		31.6		42.1		20.9		ND
Perfluoropentanesulfonic Acid (PFPeS)	2706-91-4	ng/L	ND		14.2		ND		ND		ND		60		ND		ND		21.4		32.8		ND		ND		ND		11.7		ND		ND		ND
Perfluoroheptanoic Acid (PFHpA)	375-85-9	ng/L	1.9		1.28	J	1.58	J	2.51		0.852	J	0.918	J	1.06	J	0.981	J	4.07		2.61		3.12		3.19		1.82	J	1.77	J	4.32		2.38		ND
Perfluorohexanesulfonic Acid (PFHxS)	355-46-4	ng/L	ND		14.4		0.772	J	1.67	J	ND		4.84		0.629	J	0.711	J	2.29		4.22		1.02	J	0.959	J	1.62	J	2.99		3.29		1.77	J	ND
Perfluorooctanoic Acid (PFOA)	335-67-1	ng/L	9.97		4.92		8.19		13.1		4.13		3.66		8.26		6.78		11.4		4.96		10.6		11.2		3.82		3.87		16.3		8.15		ND
Perfluoroheptanesulfonic Acid (PFHpS)	375-92-8	ng/L	ND		ND		ND		ND		ND		ND		ND		ND		ND		ND		ND		ND		ND		ND		ND		ND		ND
Perfluorononanoic Acid (PFNA)	375-95-1	ng/L	0.893	J	ND		0.614	J	1.02	J	0.363	J	0.314	J	0.353	J	0.492	J	56.6		27.2		30		42		ND		ND		0.902	J	0.377	J	ND
Perfluorooctanesulfonic Acid (PFOS)	1763-23-1	ng/L	5.35		7.8		2.08		3.43		3.33		2.98		1.35	J	2.08		4.34		4.22		3.46		4.24		2.89		2.93		5.42		2.97		ND
Perfluorodecanoic Acid (PFDA)	335-76-2	ng/L	0.373	J	0.61	J	0.753	J	1.15	J	0.459	J	1.78	J	0.614	J	0.648	J	1.58	J	2.25		1.32	J	1.79	J	ND		0.603	J	1.04	J	0.48	J	ND
Perfluorononanesulfonic Acid (PFNS)	68259-12-1	ng/L	ND		ND		ND		ND		ND		ND		ND		ND		ND		ND		ND		ND		ND		ND		ND		ND		ND
Perfluoroundecanoic Acid (PFUnA)	2058-94-8	ng/L	ND		ND		ND		ND		ND		ND		ND		ND		5.24		6.3		ND		0.466	J	ND		ND		ND		ND		ND
Perfluorodecanesulfonic Acid (PFDS)	335-77-3	ng/L	ND		ND		ND		ND		ND		ND		ND		ND		ND		2.16		ND		ND		ND		ND		ND		ND		ND
Perfluorododecanoic Acid (PFDoA)	307-55-1	ng/L	ND		ND		ND		ND		ND		0.447	J	ND		ND		ND		0.746	J	ND		ND		ND		ND		ND		ND		ND
Perfluorotridecanoic Acid (PFTrDA)	72629-94-8	ng/L	ND		ND		ND		ND		ND		ND		ND		ND		1.29	J	2.12		ND		ND		ND		ND		ND		ND		ND
Perfluorotetradecanoic Acid (PFTA)	376-06-7	ng/L	ND		ND		ND		ND		ND		ND		ND		ND		ND		ND		ND		ND		ND		ND		ND		ND		ND
Reporting Limit (RL)		ng/L	1.84		2.12		1.87		1.79		1.85		1.96		1.84		1.85		1.99		1.89		1.82		1.86		2.54		2.18		1.81		1.83		ND
Sum 18 PFAS		ng/L	78.106		221.61		63.069		108.98		64.744		130.689		47.486		45.032		242.86		193.666		118.82		129.745		24.11		109.433		133.452		64.747		0
	LOCATION		Bard+CD (1)				Bard+CD (2)				Bard+CD (3)				OD+CD				FIELD BLANK
	SAMPLING DATE		2019-07-17	2019-07-17	2019-07-17	2019-07-17	2019-07-17	2019-07-17	2019-07-17	2019-07-17	2019-07-16	2019-07-16	2019-07-16	2019-07-16	2019-07-16	2019-07-16	2019-07-16	2019-07-16	2019-07-16
	SAMPLE TYPE		After Primary	After Secondary	After Chlorination	After Dechlorination	After Primary	After Secondary	After Chlorination	After Dechlorination	After Primary	After Secondary	After Chlorination	After Dechlorination	After Primary	After Secondary	After Chlorination	After Dechlorination
Perfluorinated Alkyl Acids by Isotope Dilution	Molar Mass	Unit	Conc.	Conc.	Conc.	Conc.	Conc.	Conc.	Conc.	Conc.	Conc.	Conc.	Conc.	Conc.	Conc.	Conc.	Conc.	Conc.	Conc.
Perfluorobutanoic Acid (PFBA)	214.04	pmol/L	216.782	481.218	34.8066	41.1138	194.823	122.874	36.0213	29.06	244.814	120.538	37.5631	34.9	22.1454	113.063	50.9251	24.388	ND
Perfluoropentanoic Acid (PFPeA)	264.05	pmol/L	15.6031	85.9686	56.8074	104.526	20.9809	44.3098	51.8841	49.2331	112.857	67.4115	87.1047	82.1814	14.2776	104.904	163.227	76.5007	ND
Perfluorobutanesulfonic Acid (PFBS)	300.1	pmol/L	15.8614	27.9907	13.7621	30.3232	9.23026	6.16461	5.6981	7.73076	26.1579	8.26391	10.5298	10.4299	4.23192	6.8977	20.2599	7.66411	ND
Perfluorohexanoic Acid (PFHxA)	314.05	pmol/L	13.8195	141.06	71.6446	129.279	17.8316	50.6289	38.5289	37.5736	142.016	184.684	111.766	106.989	13.31	100.621	134.055	66.5499	ND
Perfluoropentanesulfonic Acid (PFPeS)	416.12	pmol/L	ND	34.1248	ND	ND	ND	144.189	ND	ND	51.4275	78.8234	ND	ND	ND	28.1169	ND	ND	ND
Perfluoroheptanoic Acid (PFHpA)	364.06	pmol/L	5.21892	3.5159	4.33994	6.89447	2.34027	2.52156	2.91161	2.69461	11.1795	7.16915	8.57002	8.76229	4.99918	4.86184	11.8662	6.53738	ND
Perfluorohexanesulfonic Acid (PFHxS)	400.11	pmol/L	ND	35.9901	1.92947	4.17385	ND	12.0967	1.57207	1.77701	5.72343	10.5471	2.5493	2.39684	4.04889	7.47294	8.22274	4.42378	ND
Perfluorooctanoic Acid (PFOA)	400.12	pmol/L	24.9175	12.2963	20.4689	32.7402	10.3219	9.14726	20.6438	16.9449	28.4915	12.3963	26.4921	27.9916	9.54714	9.6721	40.7378	20.3689	ND
Perfluoroheptanesulfonic Acid (PFHpS)	450.12	pmol/L	ND	ND	ND	ND	ND	ND	ND	ND	ND	ND	ND	ND	ND	ND	ND	ND	ND
Perfluorononanoic Acid (PFNA)	464.08	pmol/L	1.92424	ND	1.32305	2.1979	0.782193	0.676607	0.760645	1.06016	121.962	58.6106	64.644	90.5016	ND	ND	1.94363	0.81236	ND
Perfluorooctanesulfonic Acid (PFOS)	500.13	pmol/L	10.6972	15.5959	4.15892	6.85822	6.65827	5.95845	2.6993	4.15892	8.67774	8.43781	6.9182	8.4778	5.7785	5.85848	10.8372	5.93846	ND
Perfluorodecanoic Acid (PFDA)	614.1	pmol/L	0.607393	0.993324	1.22618	1.87266	0.747435	2.89855	0.999837	1.0552	2.57287	3.6639	2.14949	2.91483	ND	0.981925	1.69354	0.781632	ND
Perfluorononanesulfonic Acid (PFNS)	550.14	pmol/L	ND	ND	ND	ND	ND	ND	ND	ND	ND	ND	ND	ND	ND	ND	ND	ND	ND
Perfluoroundecanoic Acid (PFUnA)	564.09	pmol/L	ND	ND	ND	ND	ND	ND	ND	ND	9.2893	11.1684	ND	0.826109	ND	ND	ND	ND	ND
Perfluorodecanesulfonic Acid (PFDS)	600.15	pmol/L	ND	ND	ND	ND	ND	ND	ND	ND	ND	3.5991	ND	ND	ND	ND	ND	ND	ND
Perfluorododecanoic Acid (PFDoA)	614.1	pmol/L	ND	ND	ND	ND	ND	0.727894	ND	ND	ND	1.21479	ND	ND	ND	ND	ND	ND	ND
Perfluorotridecanoic Acid (PFTrDA)	664.1	pmol/L	ND	ND	ND	ND	ND	ND	ND	ND	1.94248	3.19229	ND	ND	ND	ND	ND	ND	ND
Perfluorotetradecanoic Acid (PFTA)	714.11	pmol/L	ND	ND	ND	ND	ND	ND	ND	ND	ND	ND	ND	ND	ND	ND	ND	ND	ND
SumPFAS (post TOP Assay)		pmol/L	305.431	838.754	210.467	359.979	263.716	402.194	161.72	151.288	767.111	579.72	358.286	376.372	78.3386	382.45	443.768	213.965	0

## Sheet: Table S7
Table S7. Sludge sample PFAS concentrations (July).
	LOCATION		Bard+CD (1)		Bard+CD (2)		Bard+CD (3)		OD+CD
	SAMPLING DATE		2019-07-17		2019-07-17		2019-07-17		2019-07-16
	SAMPLE TYPE		SLUDGE		SLUDGE		SLUDGE		SLUDGE
	CAS	Units	Conc.	Qualifier	Conc.	Qualifier	Conc.	Qualifier	Conc.	Qualifier
Perfluorobutanoic Acid (PFBA)	375-22-4	ng/g	4.05	J	ND		ND		ND
Perfluoropentanoic Acid (PFPeA)	2706-90-3	ng/g	1.23	J	0.19	J	12.4	J	1.27	J
Perfluorobutanesulfonic Acid (PFBS)	375-73-5	ng/g	0.528	J	ND		ND		0.4	J
1H,1H,2H,2H-Perfluorohexanesulfonic Acid (4:2FTS)	NONE	ng/g	ND		ND		ND		ND
Perfluorohexanoic Acid (PFHxA)	307-24-4	ng/g	4.41	J	0.963	J	21.2	J	5.02	J
Perfluoropentanesulfonic Acid (PFPeS)	2706-91-4	ng/g	ND		ND		ND		ND
Perfluoroheptanoic Acid (PFHpA)	375-85-9	ng/g	0.452	J	ND		ND		0.276	J
Perfluorohexanesulfonic Acid (PFHxS)	355-46-4	ng/g	0.384	J	ND		ND		ND
Perfluorooctanoic Acid (PFOA)	335-67-1	ng/g	4.9	J	0.456	J	12.9	J	3.72	J
1H,1H,2H,2H-Perfluorooctanesulfonic Acid (6:2FTS)	27619-97-2	ng/g	ND		ND		ND		ND
Perfluoroheptanesulfonic Acid (PFHpS)	375-92-8	ng/g	ND		ND		ND		ND
Perfluorononanoic Acid (PFNA)	375-95-1	ng/g	1.56	J	ND		ND		59.1
Perfluorooctanesulfonic Acid (PFOS)	1763-23-1	ng/g	19		4.82		98	J	20.1
Perfluorodecanoic Acid (PFDA)	335-76-2	ng/g	10.6		2.59	J	30	J	18.3
1H,1H,2H,2H-Perfluorodecanesulfonic Acid (8:2FTS)	39108-34-4	ng/g	ND		ND		ND		ND
Perfluorononanesulfonic Acid (PFNS)	68259-12-1	ng/g	ND		ND		ND		ND
N-Methyl Perfluorooctanesulfonamidoacetic Acid (NMeFOSAA)	2355-31-9	ng/g	5.11	J	3.4		ND		6.4
Perfluoroundecanoic Acid (PFUnA)	2058-94-8	ng/g	1.64	J	ND		ND		19.4
Perfluorodecanesulfonic Acid (PFDS)	335-77-3	ng/g	0.969	J	ND		ND		5.48
Perfluorooctanesulfonamide (FOSA)	754-91-6	ng/g	2.2	J	0.72	J	ND		1.64	J
N-Ethyl Perfluorooctanesulfonamidoacetic Acid (NEtFOSAA)	2991-50-6	ng/g	5.13	J	1.69	J	29.5	J	14.4
Perfluorododecanoic Acid (PFDoA)	307-55-1	ng/g	3.86	J	1.02	J	ND		5.84
Perfluorotridecanoic Acid (PFTrDA)	72629-94-8	ng/g	ND		ND		ND		3.1	J
Perfluorotetradecanoic Acid (PFTA)	376-06-7	ng/g	0.711	J	0.218	J	ND		1.79	J
Reporting Limit (RL)		ng/g	5.45		3.38		178		5.07
Sum PFAS		ng/g	66.734		16.067		204		166.236
Solids, Total	NONE	%	18		26.3		0.54		17.3

## Sheet: Table S8
Table S8. Great Bay surface water PFAS concentrations
Analyte	LOCATION		Mill Pond			Adams Point			Great Bay			Squamscott			Hilton Park		Blank Sample (collected @ Mill Pond site)
	SAMPLING DATE		2019-08-06			2019-08-06			2019-08-06			2019-08-06			2019-07-16		2019-08-06
	SAMPLE MATRIX		Surface water			Surface water			Surface water			Surface water			Surface water
	CAS	Unit	Conc	Qualifier	MDL	Conc.	Qualifier	MDL	Conc.	Qualifier	MDL	Conc.	Qualifier	MDL	Conc.	Qualifier	Conc.	Qualifier	MDL
Perfluorobutanoic Acid (PFBA)	375-22-4	ng/L	0.47	J	0.368	1.21	J	0.371	2.14		0.366	2.77		0.376	0.87	J	ND		0.38
Perfluoropentanoic Acid (PFPeA)	2706-90-3	ng/L	0.65	J	0.357	0.81	J	0.36	1.01	J	0.355	1.86		0.365	1.2	J	ND		0.369
Perfluorobutanesulfonic Acid (PFBS)	375-73-5	ng/L	ND		0.215	ND		0.216	ND		0.213	1.27	J	0.22	0.43	J	ND		0.222
1H,1H,2H,2H-Perfluorohexanesulfonic Acid (4:2FTS)	NONE	ng/L	ND		0.408	ND		0.411	ND		0.405	ND		0.417	ND		ND		0.422
Perfluorohexanoic Acid (PFHxA)	307-24-4	ng/L	0.91	J	0.296	1.08	J	0.298	1.27	J	0.294	2.46		0.302	1.47	J	0.36	J	0.306
Perfluoropentanesulfonic Acid (PFPeS)	2706-91-4	ng/L	ND		0.221	ND		0.223	ND		0.22	ND		0.226	ND		ND		0.229
Perfluoroheptanoic Acid (PFHpA)	375-85-9	ng/L	0.44	J	0.203	0.34	J	0.205	0.4	J	0.202	1.01	J	0.208	0.78	J	ND		0.21
Perfluorohexanesulfonic Acid (PFHxS)	355-46-4	ng/L	0.69	J	0.339	0.47	J	0.342	0.73	J	0.337	1.01	J	0.347	0.33	J	ND		0.351
Perfluorooctanoic Acid (PFOA)	335-67-1	ng/L	0.61	J	0.213	0.8	J	0.214	1.42	J	0.211	2.12		0.218	1.48	J	ND		0.22
1H,1H,2H,2H-Perfluorooctanesulfonic Acid (6:2FTS)	27619-97-2	ng/L	ND		1.2	ND		1.21	ND		1.19	ND		1.23	ND		ND		1.24
Perfluoroheptanesulfonic Acid (PFHpS)	375-92-8	ng/L	ND		0.621	ND		0.625	ND		0.616	ND		0.635	ND		ND		0.642
Perfluorononanoic Acid (PFNA)	375-95-1	ng/L	ND		0.282	ND		0.284	ND		0.28	ND		0.288	ND		ND		0.291
Perfluorooctanesulfonic Acid (PFOS)	1763-23-1	ng/L	2.55		0.455	1.4	J	0.458	3.63		0.452	4.19		0.465	1.42	J	ND		0.47
Perfluorodecanoic Acid (PFDA)	335-76-2	ng/L	ND		0.274	ND		0.276	ND		0.272	ND		0.28	ND		ND		0.284
1H,1H,2H,2H-Perfluorodecanesulfonic Acid (8:2FTS)	39108-34-4	ng/L	ND		1.09	ND		1.1	ND		1.09	ND		1.12	ND		ND		0.113
Perfluorononanesulfonic Acid (PFNS)	68259-12-1	ng/L	ND		1.01	ND		1.02	ND		1	ND		1.03	ND		ND		1.04
N-Methyl Perfluorooctanesulfonamidoacetic Acid (NMeFOSAA)	2355-31-9	ng/L	ND		0.585	ND		0.589	ND		0.581	ND		0.598	ND		ND		0.604
Perfluoroundecanoic Acid (PFUnA)	2058-94-8	ng/L	ND		0.235	ND		0.236	ND		0.233	ND		0.24	ND		ND		0.242
Perfluorodecanesulfonic Acid (PFDS)	335-77-3	ng/L	ND		0.884	ND		0.891	ND		0.878	ND		0.904	ND		ND		0.914
Perfluorooctanesulfonamide (FOSA)	754-91-6	ng/L	ND		0.523	ND		0.527	ND		0.52	ND		0.535	ND		ND		0.541
N-Ethyl Perfluorooctanesulfonamidoacetic Acid (NEtFOSAA)	2991-50-6	ng/L	ND		0.726	ND		0.731	ND		0.72	ND		0.742	ND		ND		0.75
Perfluorododecanoic Acid (PFDoA)	307-55-1	ng/L	ND		0.336	ND		0.338	ND		0.333	ND		0.343	ND		ND		0.347
Perfluorotridecanoic Acid (PFTrDA)	72629-94-8	ng/L	ND		0.295	ND		0.297	ND		0.293	ND		0.302	ND		ND		0.305
Perfluorotetradecanoic Acid (PFTA)	376-06-7	ng/L	ND		0.224	ND		0.225	ND		0.222	ND		0.229	ND		ND		0.231
Reporting Limit (RL)		ng/L	1.8			1.82			1.79			1.84			1.75		1.86
Sum 24 PFAS		ng/L	6.32			6.11			10.6			16.69			7.98
Analyte	LOCATION		Location 1	Location 2	Location 3	Location 4	Location 5	Blank Sample
	SAMPLING DATE		2019-08-06	2019-08-06	2019-08-06	2019-08-06	2019-07-16	2019-08-06
	SAMPLE MATRIX		Surface water	Surface water	Surface water	Surface water	Surface water
	Molar Mass (g/mol)	Unit	Conc	Conc.	Conc.	Conc.	Conc.	Conc.
Perfluorobutanoic Acid (PFBA)	214.04	pmol/L	2.19585	5.65315	9.99813	12.9415	4.06466	ND
Perfluoropentanoic Acid (PFPeA)	264.05	pmol/L	2.46165	3.0676	3.82503	7.04412	4.54459	ND
Perfluorobutanesulfonic Acid (PFBS)	300.1	pmol/L	ND	ND	ND	4.23192	1.43286	ND
1H,1H,2H,2H-Perfluorohexanesulfonic Acid (4:2FTS)	328.15	pmol/L	ND	ND	ND	ND	ND	ND
Perfluorohexanoic Acid (PFHxA)	314.05	pmol/L	2.89763	3.43894	4.04394	7.83315	4.68078	1.14631
Perfluoropentanesulfonic Acid (PFPeS)	416.12	pmol/L	ND	ND	ND	ND	ND	ND
Perfluoroheptanoic Acid (PFHpA)	364.06	pmol/L	1.20859	0.933912	1.09872	2.77427	2.1425	ND
Perfluorohexanesulfonic Acid (PFHxS)	400.11	pmol/L	1.72453	1.17468	1.8245	2.52431	0.824773	ND
Perfluorooctanoic Acid (PFOA)	400.12	pmol/L	1.52454	1.9994	3.54894	5.29841	3.69889	ND
1H,1H,2H,2H-Perfluorooctanesulfonic Acid (6:2FTS)	428.17	pmol/L	ND	ND	ND	ND	ND	ND
Perfluoroheptanesulfonic Acid (PFHpS)	450.12	pmol/L	ND	ND	ND	ND	ND	ND
Perfluorononanoic Acid (PFNA)	464.08	pmol/L	ND	ND	ND	ND	ND	ND
Perfluorooctanesulfonic Acid (PFOS)	500.13	pmol/L	5.09867	2.79927	7.25811	8.37782	2.83926	ND
Perfluorodecanoic Acid (PFDA)	614.1	pmol/L	ND	ND	ND	ND	ND	ND
1H,1H,2H,2H-Perfluorodecanesulfonic Acid (8:2FTS)	528.18	pmol/L	ND	ND	ND	ND	ND	ND
Perfluorononanesulfonic Acid (PFNS)	550.14	pmol/L	ND	ND	ND	ND	ND	ND
N-Methyl Perfluorooctanesulfonamidoacetic Acid (NMeFOSAA)	571.21	pmol/L	ND	ND	ND	ND	ND	ND
Perfluoroundecanoic Acid (PFUnA)	564.09	pmol/L	ND	ND	ND	ND	ND	ND
Perfluorodecanesulfonic Acid (PFDS)	600.15	pmol/L	ND	ND	ND	ND	ND	ND
Perfluorooctanesulfonamide (FOSA)	499.14	pmol/L	ND	ND	ND	ND	ND	ND
N-Ethyl Perfluorooctanesulfonamidoacetic Acid (NEtFOSAA)	585.24	pmol/L	ND	ND	ND	ND	ND	ND
Perfluorododecanoic Acid (PFDoA)	614.1	pmol/L	ND	ND	ND	ND	ND	ND
Perfluorotridecanoic Acid (PFTrDA)	664.1	pmol/L	ND	ND	ND	ND	ND	ND
Perfluorotetradecanoic Acid (PFTA)	714.11	pmol/L	ND	ND	ND	ND	ND	ND
SumPFAS			17.1115	19.067	31.5974	51.0255	24.2283	1.14631

## Sheet: Table S9
Table S9. Great Bay surface water PFAS concentrations following total oxidizable precursor (TOP) assay (July).
ANALYTE	SAMPLE ID:		Mill Pond			Adams Point			Great Bay			Squamscott			Hilton Park		Blank Sample (collected @ Mill Pond site)
	COLLECTION DATE:		2019-08-06			2019-08-06			2019-08-06			2019-08-06			2019-07-16		2019-08-06
	SAMPLE MATRIX:		Surface water			Surface water			Surface water			Surface water			Surface water
	CAS	Unit	Conc.	Qualifier	MDL	Conc.	Qualifier	MDL	Conc.	Qualifier	MDL	Conc.	Qualifier	MDL	Conc.	Qualifier	Conc.	Qualifier
Perfluorobutanoic Acid (PFBA)	375-22-4	ng/L	0.88	J	0.372	0.88	J	0.376	1.14	J	0.371	2		0.376	0.88	J	ND
Perfluoropentanoic Acid (PFPeA)	2706-90-3	ng/L	0.91	J	0.361	1.11	J	0.365	1.42	J	0.36	2.44		0.365	1.14	J	ND
Perfluorobutanesulfonic Acid (PFBS)	375-73-5	ng/L	ND		0.217	ND		0.22	ND		0.216	1.47	J	0.22	ND		ND
Perfluorohexanoic Acid (PFHxA)	307-24-4	ng/L	0.95	J	0.299	1.2	J	0.302	1.88		0.298	2.63		0.302	1.35	J	ND
Perfluoropentanesulfonic Acid (PFPeS)	2706-91-4	ng/L	ND		0.224	ND		0.226	ND		0.223	ND		0.226	ND		ND
Perfluoroheptanoic Acid (PFHpA)	375-85-9	ng/L	0.44	J	0.205	0.6	J	0.208	0.78	J	0.205	1.14	J	0.208	0.86	J	ND
Perfluorohexanesulfonic Acid (PFHxS)	355-46-4	ng/L	ND		0.343	ND		0.347	0.46	J	0.342	0.57	J	0.347	ND		ND
Perfluorooctanoic Acid (PFOA)	335-67-1	ng/L	2.62		0.215	3.4		0.218	4.9		0.214	5.5		0.218	12.5		ND
Perfluoroheptanesulfonic Acid (PFHpS)	375-92-8	ng/L	ND		0.628	ND		0.635	ND		0.625	ND		0.635	ND		ND
Perfluorononanoic Acid (PFNA)	375-95-1	ng/L	ND		0.285	ND		0.288	ND		0.284	0.7	J	0.288	ND		ND
Perfluorooctanesulfonic Acid (PFOS)	1763-23-1	ng/L	1.89		0.46	1.3	J	0.465	1.91		0.458	5.2		0.465	0.57	J	ND
Perfluorodecanoic Acid (PFDA)	335-76-2	ng/L	ND		0.277	ND		0.28	ND		0.276	0.48	J	0.28	ND		ND
Perfluorononanesulfonic Acid (PFNS)	68259-12-1	ng/L	ND		1.02	ND		1.03	ND		1.02	ND		1.03	ND		ND
Perfluoroundecanoic Acid (PFUnA)	2058-94-8	ng/L	ND		0.237	ND		0.24	ND		0.236	ND		0.24	ND		ND
Perfluorodecanesulfonic Acid (PFDS)	335-77-3	ng/L	ND		0.894	ND		0.904	ND		0.891	ND		0.904	ND		ND
Perfluorododecanoic Acid (PFDoA)	307-55-1	ng/L	ND		0.339	ND		0.343	ND		0.338	ND		0.343	ND		ND
Perfluorotridecanoic Acid (PFTrDA)	72629-94-8	ng/L	ND		0.298	ND		0.302	ND		0.297	ND		0.302	ND		ND
Perfluorotetradecanoic Acid (PFTA)	376-06-7	ng/L	ND		0.226	ND		0.229	ND		0.225	ND		0.229	ND		ND
Reporting Limit (RL)		ng/L	1.82			1.84			1.82			1.84			1.82		ND
Sum 18 PFAS		ng/L	7.69			8.49			12.49		6.879		0		17.3
ANALYTE	SAMPLE ID:		Location 1	Location 2	Location 3	Location 4	Location 5	Blank Sample
	COLLECTION DATE:		2019-08-06	2019-08-06	2019-08-06	2019-08-06	2019-07-16	2019-08-06
	SAMPLE MATRIX:		Surface water	Surface water	Surface water	Surface water	Surface water
	Molar Mass	Unit	Conc.	Conc.	Conc.	Conc.	Conc.	Conc.
Perfluorobutanoic Acid (PFBA)	214.04	pmol/L	4.11138	4.11138	5.32611	9.34405	4.11138	ND
Perfluoropentanoic Acid (PFPeA)	264.05	pmol/L	3.44632	4.20375	5.37777	9.24067	4.31736	ND
Perfluorobutanesulfonic Acid (PFBS)	300.1	pmol/L	ND	ND	ND	4.89837	ND	ND
Perfluorohexanoic Acid (PFHxA)	314.05	pmol/L	3.025	3.82105	5.98631	8.37446	4.29868	ND
Perfluoropentanesulfonic Acid (PFPeS)	416.12	pmol/L	ND	ND	ND	ND	ND	ND
Perfluoroheptanoic Acid (PFHpA)	364.06	pmol/L	1.20859	1.64808	2.1425	3.13135	2.36225	ND
Perfluorohexanesulfonic Acid (PFHxS)	400.11	pmol/L	ND	ND	1.14968	1.42461	ND	ND
Perfluorooctanoic Acid (PFOA)	400.12	pmol/L	6.54804	8.49745	12.2463	13.7459	31.2406	ND
Perfluoroheptanesulfonic Acid (PFHpS)	450.12	pmol/L	ND	ND	ND	ND	ND	ND
Perfluorononanoic Acid (PFNA)	464.08	pmol/L	ND	ND	ND	1.50836	ND	ND
Perfluorooctanesulfonic Acid (PFOS)	500.13	pmol/L	3.77902	2.59932	3.81901	10.3973	1.1397	ND
Perfluorodecanoic Acid (PFDA)	614.1	pmol/L	ND	ND	ND	0.781632	ND	ND
Perfluorononanesulfonic Acid (PFNS)	550.14	pmol/L	ND	ND	ND	ND	ND	ND
Perfluoroundecanoic Acid (PFUnA)	564.09	pmol/L	ND	ND	ND	ND	ND	ND
Perfluorodecanesulfonic Acid (PFDS)	600.15	pmol/L	ND	ND	ND	ND	ND	ND
Perfluorododecanoic Acid (PFDoA)	614.1	pmol/L	ND	ND	ND	ND	ND	ND
Perfluorotridecanoic Acid (PFTrDA)	664.1	pmol/L	ND	ND	ND	ND	ND	ND
Perfluorotetradecanoic Acid (PFTA)	714.11	pmol/L	ND	ND	ND	ND	ND	ND
SumPFAS (post TOP Assay)		pmol/L	22.1183	24.881	36.0477	62.8467	47.47	0

## Sheet: Table S12
Table S12. Wastewater PFAS concentration data reported on New Hampshire Department of Environmental Serves (NHDES) OneStop Database.
Analyte	WWTF 1		WWTF 2		WWTF 3		WWTF 4		WWTF 5		WWTF 6		WWTF 7		WWTF 8		WWTF 9		WWTF 10		WWTF 11
	Influent	Effluent	Influent	Effluent	Influent	Effluent	Influent	Effluent	Influent	Effluent	Influent	Effluent	Influent	Effluent	Influent	Effluent	Influent	Effluent	Influent	Effluent	Influent	Effluent
	2017-06-13	2017-06-13	2017-06-19	2017-06-19	2016-04-13	2016-04-13	2017-06-19	2017-06-19	2017-06-19	2017-06-19	2017-06-13	2017-06-13	2017-06-13	2017-06-13	2017-03-22	2017-03-22	2017-06-13	2017-06-13	2017-06-19	2017-06-19	2017-06-19	2017-06-19
Perfluorobutanoic Acid (PFBA)	13	7	<4	<4	<5	12	<4	<4	<4	<4	<4	<4	6	12	<9.6	<9.6	<4	<4	5	12	23	<4
Perfluoropentanoic Acid (PFPeA)	5	21	13	16	120	9	6	16	<4	5	<4	16	<4	73	29	9	<4	7	13	57	<4	10
Perfluorobutanesulfonic Acid (PFBS)	<4	<4	<4	<4	<5	<5	<4	<4	5	4	<4	<4	<4	<4	6	<4.8	<4	<4	4	5	<4	5
Perfluorohexanoic Acid (PFHxA)	7	46	13	17	9	47	6	11	5	18	<4	6	4	52	10	20	4	10	26	65	6	26
Perfluoroheptanoic Acid (PFHpA)	<4	<4	<4	<4	<5	<5	<4	<4	<4	<4	<4	<4	<4	<4	7	5	<4	<4	15	14	<4	<4
Perfluorohexanesulfonic Acid (PFHxS)	<4	<4	<4	<4	7	<5	8	6	<4	<4	4	<4	<4	<4	7	8	<4	<4	6	6	<4	<4
Perfluorooctanoic Acid (PFOA)	6	6	6	8	9	15	7	11	<4	4	<4	11	<4	7	15	15	6	10	53	54	<4	7
Perfluorononanoic Acid (PFNA)	<4	<4	<4	<4	<5	<5	<4	<4	<4	<4	<4	<4	<4	<4	<4.8	<4.8	<4	<4	<4	4	<4	<4
Perfluorooctanesulfonic Acid (PFOS)	6	7	7	<4	9	9	22	10	6	4	14	<4	<4	<4	22	14	<4	14	20	14	10	<4
Perfluorodecanoic Acid (PFDA)	<4	<4	<4	<4	<5	<5	<4	<4	<4	<4	<4	<4	<4	<4	Not Analyzed	Not Analyzed	<4	4	<4	<4	<4	<4
Perfluoroundecanoic Acid (PFUnA)	<4	<4	<4	<4	<5	<5	<4	<4	<4	<4	<4	<4	<4	<4	Not Analyzed	Not Analyzed	<4	<4	<4	<4	<4	<4
Perfluorodecanesulfonic Acid (PFDS)	<4	<4	<4	<4	<5	<5	<4	<4	<4	<4	<4	<4	<4	<4	Not Analyzed	Not Analyzed	<4	<4	<4	<4	<4	<4
Perfluorooctanesulfonamide (FOSA)	<4	<4	<4	<4	<5	<5	<4	<4	<4	<4	<4	<4	<4	<4	Not Analyzed	Not Analyzed	<4	<4	<4	<4	<4	<4
Perfluorododecanoic Acid (PFDoA)	<4	<4	<4	<4	<5	<5	<4	<4	<4	<4	<4	<4	<4	<4	Not Analyzed	Not Analyzed	<4	<4	<4	<4	<4	<4
Perfluorotridecanoic Acid (PFTrDA)	<4	<4	<4	<4	<5	<5	<4	<4	<4	<4	<4	<4	<4	<4	Not Analyzed	Not Analyzed	<4	<4	<4	<4	<4	<4
Perfluorotetradecanoic Acid (PFTA)	<4	<4	<4	<4	<5	<5	<4	<4	<4	<4	<4	<4	<4	<4	Not Analyzed	Not Analyzed	<4	<4	<4	<4	<4	<4
Sum 16 PFAS	38	86	39	41	154	92	50	53	15	35	18	33	10	144	95	71	10	45	143	232	38	47
	J flagged data not provided with dataset
	< values indicate values below reporting limit (or not detected)

## Sheet: Definitions
J	Estimated value. This represent a concentration below reporting limit but above method detection limit.
ND	Not detected at the reported detection limit for the sample.
RL	The value at which an instrument can accurately measure an analyte at a specific concentration. The RL includes any adjustments from dilutions, concentrations or moisture content, where applicable. Determined by concentration of laboratory control sample analyzed with samples
MDL	This value represents the level to which target analyte concentrations are reported as estimated values, when those target analyte concentrations are quantified below the reporting limit (RL). The MDL includes any adjustments from dilutions, concentrations or moisture content, where applicable. the method detection limit is defined as the statistically calculated minimum concentration that can be…
